# Supplementary material for: Anion metathesis in ionic silicananoparticle networks
Source: Royal Society of Chemistry journal article supplement (doi:10.1039/b915050a), 2009-10-07
Supplement: b915050a.pdf [file b915050a.pdf]

## Supplementary Materials: Anion Metathesis in Ionic Silica Nanoparticle Networks

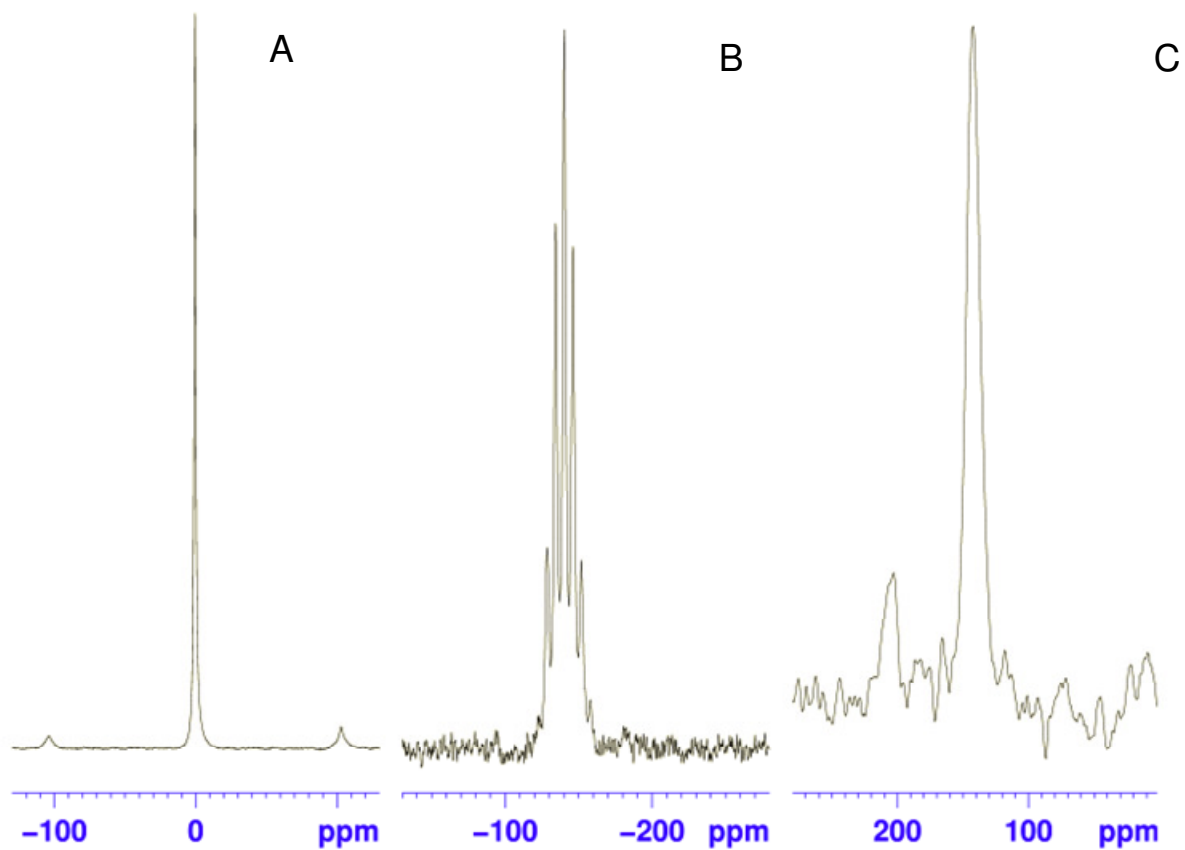

**Figure 1, Supplementary Materials.** (A)  $^{11}\text{B}$  NMR of **Im/BF<sub>4</sub>**, (B)  $^{31}\text{P}$  NMR of **Im/PF<sub>6</sub>** and (C)  $^{15}\text{N}$  NMR of **Im/NTFSI**.
